# Supplementary material
Source: MDPI journal article supplement (https://www.mdpi.com/1424-8247/16/6/824)

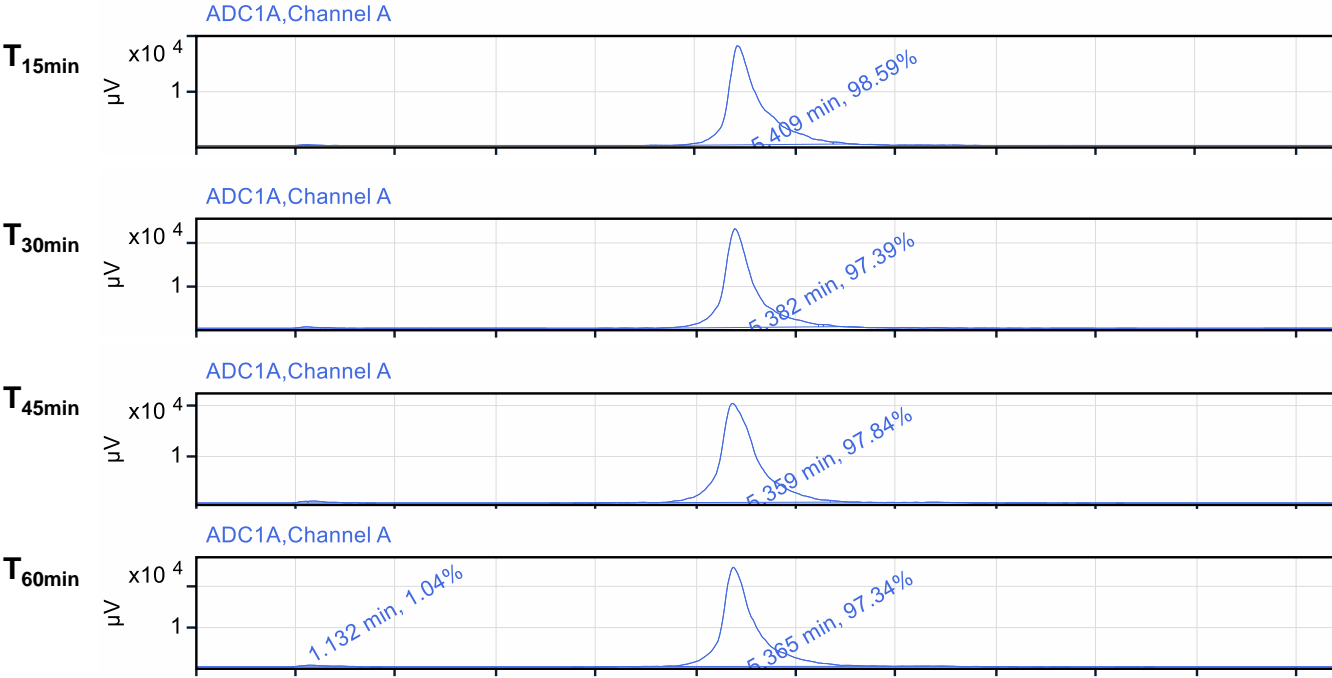

FIG S1

**a** Cardiac lysate

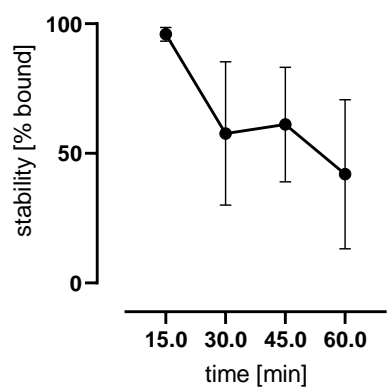

**b**

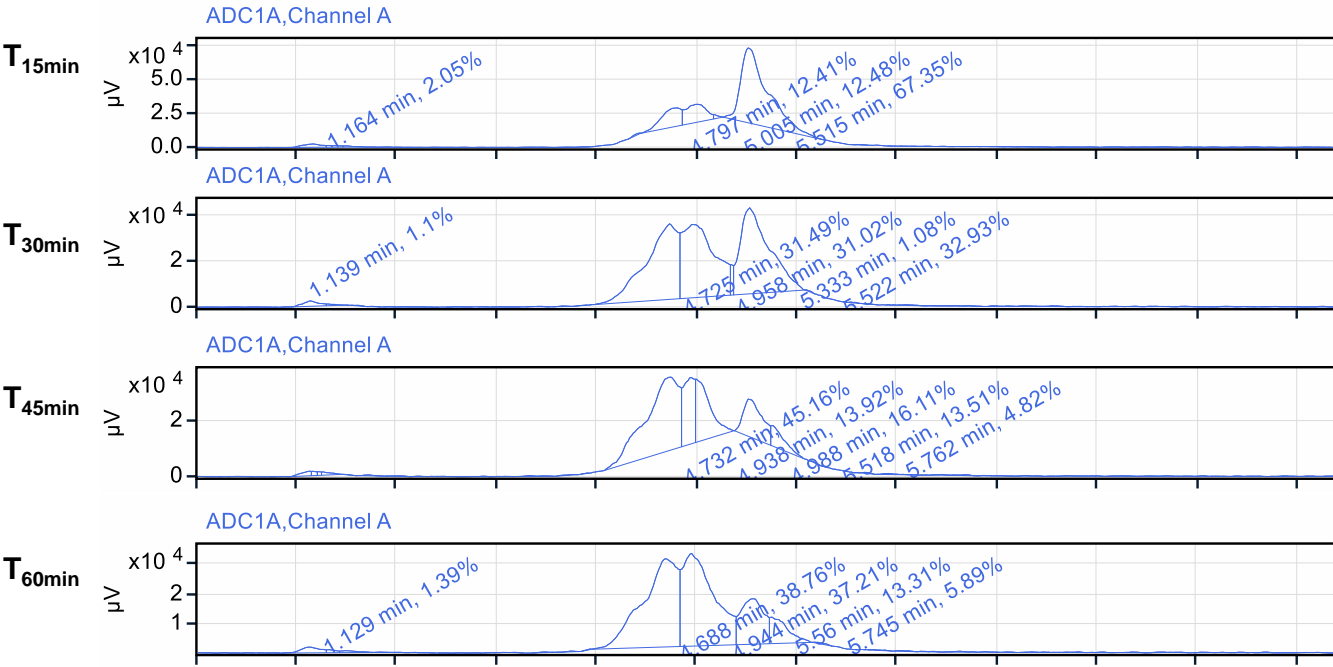

FIG S2

**a**  
Proteinase K

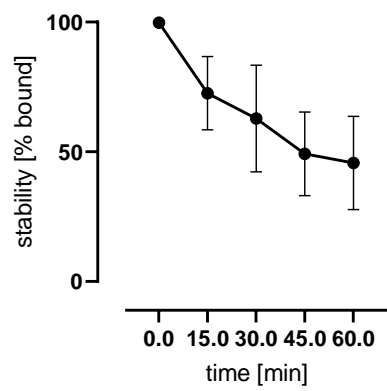

**b**

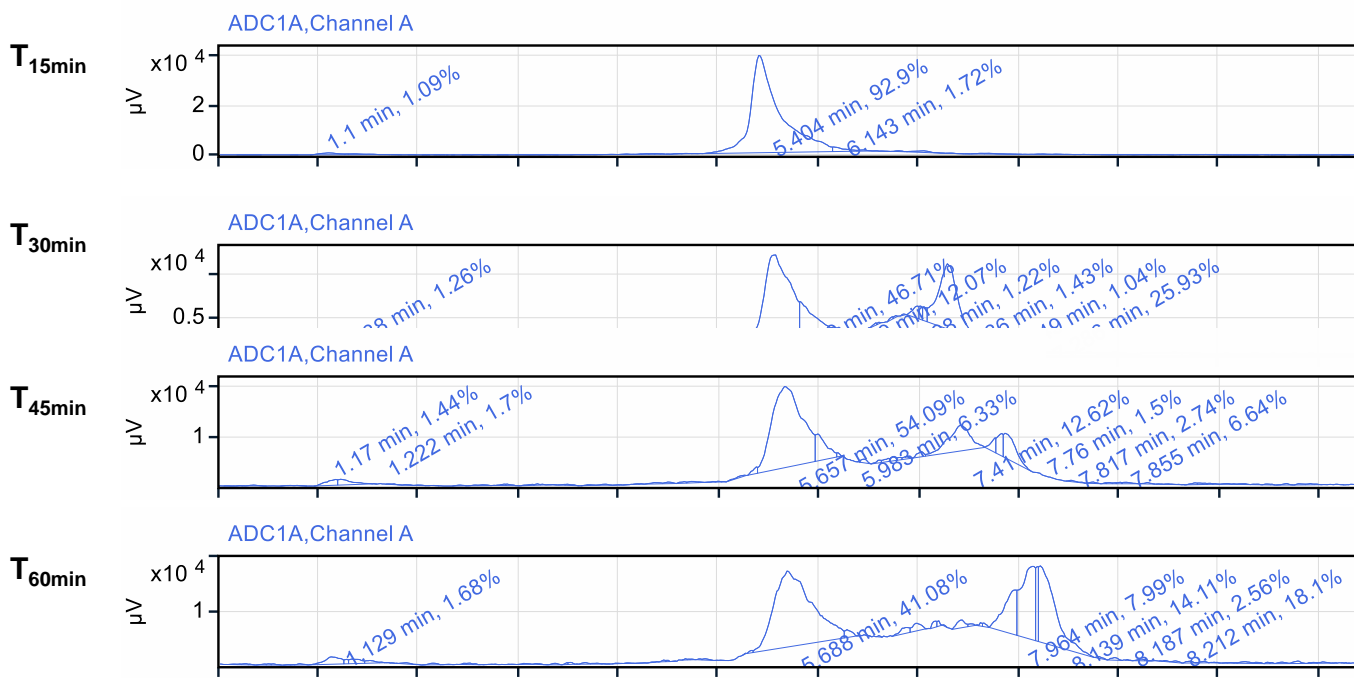

FIG S3

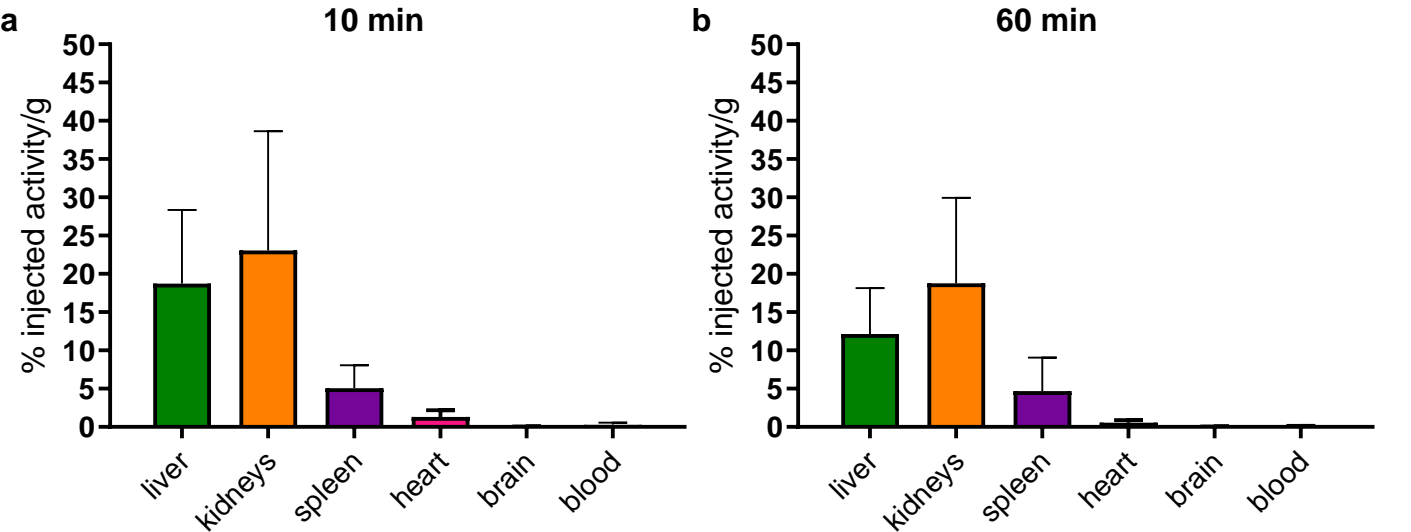

FIG S4

Supplement: s1 [file s1]
